# Supplementary material
Source: PubMed Central journal article supplement (PMC3535938)
Supplement: AAC.01467-12_zac001131464so1.pdf [file AAC.01467-12_zac001131464so1.pdf]

**TABLE S1** Complete list of compounds from primary screen showing more than 70% inhibition against CHIKV-infection upon treatment at 10  $\mu$ M concentrations.

| <b>Compound</b>     | <b>Percentage Inhibition (%)</b> |
|---------------------|----------------------------------|
| Nigericin Na        | 100.00                           |
| Dipterocarpol       | 100.00                           |
| Anisomycin          | 99.962                           |
| Aloe-emodine        | 99.89                            |
| Retrorsine          | 99.84                            |
| Mycophenolic acid   | 99.82                            |
| Harringtonine       | 99.76                            |
| Tetrahydrolipstatin | 99.73                            |
| Tunicamycin B       | 99.7                             |
| Corydaline          | 99.69                            |
| Ellagic acid        | 99.61                            |
| Lycorine HCl        | 99.59                            |
| Usnic acid, (+)-    | 99.54                            |
| Rhapontin           | 99.53                            |
| Emetine 2HCl        | 99.50                            |
| Ferutinin           | 99.43                            |
| Diacetoxyscirpenol  | 99.27                            |
| Bleomycin           | 99.27                            |
| Cycloheximide       | 99.10                            |
| Acivicin            | 99.07                            |
| Narasin             | 98.89                            |
| Jervine             | 98.35                            |
| Hypocrellin B       | 98.08                            |
| Valinomycin         | 97.79                            |
| Hypocrellin A       | 97.64                            |
| Menadione           | 97.53                            |
| E-64                | 95.94                            |
| Magnolol            | 95.74                            |
| Daunorubicin HCl    | 95.56                            |
| Nonactin            | 95.31                            |
| Antimycin A1        | 94.99                            |
| Ochratoxin A        | 94.95                            |
| Papaverine HCl      | 94.76                            |
| Parthenolide        | 93.95                            |
| Vinblastine sulfate | 93.75                            |
| Chelidonine, (+)-   | 93.22                            |
| Rottlerin           | 92.81                            |
| Grayanotoxin III    | 91.39                            |

|                    |       |
|--------------------|-------|
| Gossypol           | 90.89 |
| Sanguinarine       | 90.83 |
| Mithramycin A      | 87.96 |
| Actinomycin D      | 86.92 |
| Cyclopiazonic acid | 79.93 |
| Harmine HCl        | 73.68 |

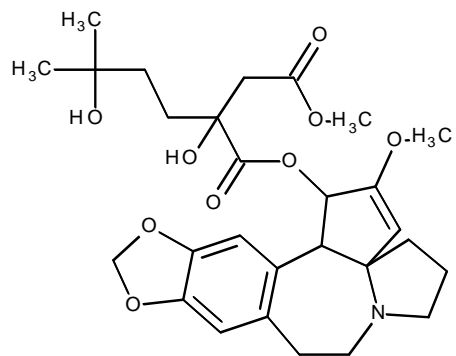

**Harringtonine**

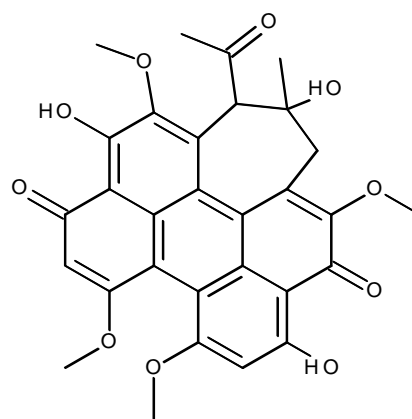

**Hypocrellin A**

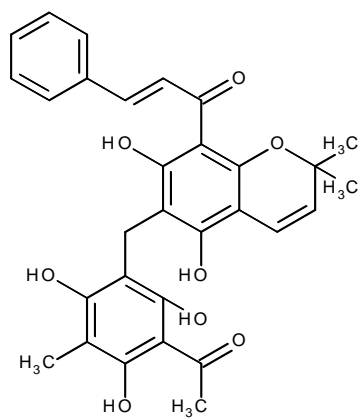

**Rottlerin**

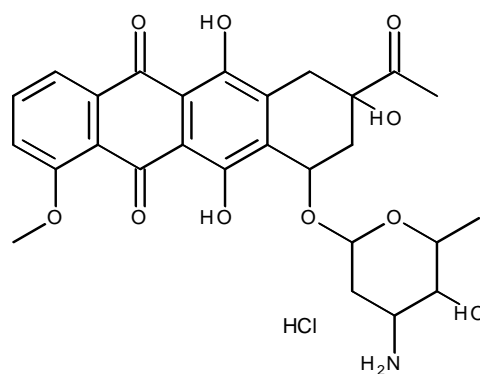

**Daunorubicin HCl**

**FIG S1** Structures of compounds selected for secondary assays to confirm their *in vitro* anti-CHIKV activity.

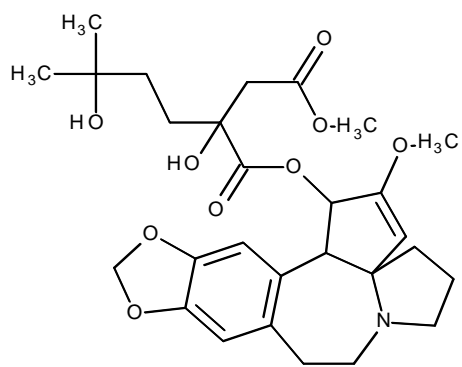

**Harringtonine**

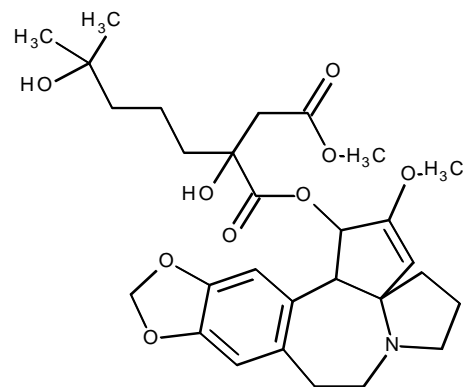

**Homoharringtonine**

**FIG S2** The structures of harringtonine and homoharringtonine differ by one methyl group on the side chain.

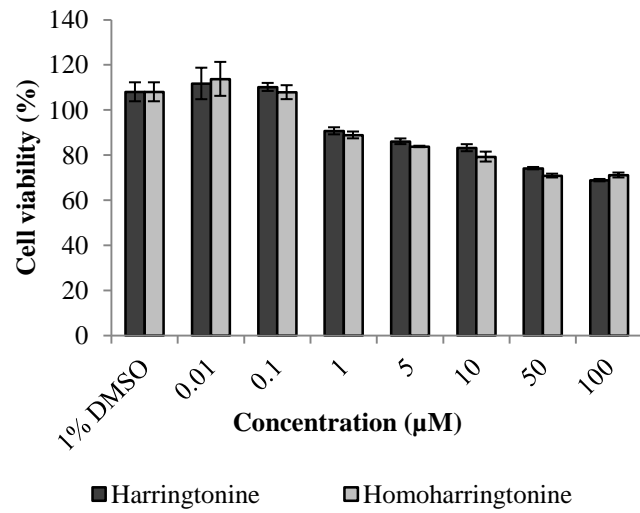

**FIG S3** Treatment of BHK21 cells with harringtonine or homoharringtonine over 3 days results in minimal cytotoxicity at drug concentrations of up to 10 µM. This indicates that antiviral effects of both drugs may be achieved at concentrations that are non-cytotoxic to cells. Error bars represent standard errors of triplicate means.
